1 **DNA-validated parthenogenesis: first case in a captive female Cuban boa**

2 **(*Chilabothrus angulifer*)**

3 Fernanda Seixas<sup>1</sup>, Francisco Morinha<sup>2</sup>, Claudia Luis<sup>3</sup>, Nuno Alvura<sup>3</sup>, Maria dos Anjos

4 Pires<sup>1\*</sup>

5 <sup>1</sup>Laboratório de Histologia e Anatomia Patológica, Escola de Ciências Agrárias e

6 Veterinárias, CECAV- University of Trás-os-Montes and Alto Douro, Quinta de Prados,

7 5000-801 Vila Real, Portugal

8 <sup>2</sup> Department of Evolutionary Ecology, National Museum of Natural Sciences (MNCN),

9 Spanish National Research Council (CSIC), José Gutiérrez Abascal 2, 28006 Madrid,

10 Spain

11 <sup>3</sup>Zoo da Maia, Rua da Igreja, S/N, 4470-184 Maia, Portugal

12 \*Corresponding author. [apires@utad.pt](mailto:apires@utad.pt) (MAP)

13 [fseixas@utad.pt](mailto:fseixas@utad.pt); [franciscomorinha@hotmail.com](mailto:franciscomorinha@hotmail.com); [claudia.l.batista@gmail.com](mailto:claudia.l.batista@gmail.com);

14 [alvura@gmail.com](mailto:alvura@gmail.com); [apires@utad.pt](mailto:apires@utad.pt)

15 **Short title: Parthenogenesis in a captive female Cuban boa**

16 **Abstract**

17 Parthenogenesis is a biological process of asexual reproduction. Recent studies have

18 highlighted the significance of this fascinating phenomenon in the vertebrate evolution.

19 Although parthenogenetic reproduction appears to be widespread among reptiles, a

20 restricted number of cases were reported in captivity and wild. Here, we studied and

21 reported an intriguing case of a 20-year old captive female Cuban boa (*Chilabothrus*

22 *angulifer*), from the Zoo da Maia (Maia, Portugal) collection, isolated from conspecifics

23 males, that gave birth twice in 4 years. The neonates from both deliveries, one fresh and  
24 the other fixed in formalin, were submitted to histopathological and molecular genetic  
25 analysis. Both neonates were homozygous for the loci analyzed, carrying only mother  
26 alleles. Furthermore, morphological abnormalities (anophthalmia) were observed in the  
27 second neonate. Our data support a pattern of parthenogenetic reproduction. This is the  
28 first documented case of facultative parthenogenesis in a Cuban boa, which can be of  
29 great interest for further research on ecology, evolution, captive breeding and  
30 conservation of the species.

31

32 Key words: parthenogenesis, snake, DNA, reptile, *Chilabothrus angulifer*

33

## 34 **Introduction**

35 Parthenogenesis is a natural form of asexual reproduction in which offspring is  
36 produced from unfertilized eggs [1,2]. This uncommon reproductive strategy was  
37 reported in less than 0.1% of vertebrate species, including a wide range of taxa (i.e.  
38 fishes, amphibians, reptiles, birds and mammals), even in wild populations [1-5].  
39 Parthenogenetic reproductive events have caught the attention of evolutionary and  
40 conservation biologists, since the absence of genetic recombination accelerate the  
41 accumulation of deleterious mutations in parthenogenetic individuals, which have  
42 considerable implications for the management and conservation of the species [6-8].

43 Obligate parthenogenesis is a biological process where all individuals within a  
44 species reproduce asexually [2,9]. This reproductive strategy is restricted to Squamate  
45 reptiles, being reported in various lizards' species and one snake (*Indotyphlops*  
46 *braminus*) [9-11]. The occasional occurrence of parthenogenesis in individuals of a

47 species that normally reproduce sexually (i.e. facultative parthenogenesis - FP) was first  
48 mentioned in the late 1800s for birds [12]. FP have been reported in various species of  
49 major vertebrate groups including reptiles, birds and elasmobranchs (sharks and rays)  
50 [4,9,13,14]. Most FP events were documented from captive females after long periods  
51 without contact to male conspecifics during their reproductive lifetime [8,9]. However,  
52 parthenogenesis has more recently been reported in wild snake populations [3,15] and  
53 females housed with males [16], suggesting that its occurrence may be more frequent  
54 than previously thought in vertebrates. In addition, the reproductive viability of  
55 parthenogenetic offspring was observed in some species, which highlights the  
56 ecological and evolutionary significance of this reproductive strategy [15]. Nevertheless,  
57 the biological basis and mechanisms underlying parthenogenesis remain mostly  
58 unknown [4,9,17].

59 FP was described in at least six snake families, namely Boidae, Pythonidae,  
60 Viperidae, Acrochordidae, Colubridae and Elapidae [5,9,17]. Among boid snakes  
61 (Boidae family), parthenogenesis was recorded and validated by genetic analysis in *Boa*  
62 *constrictor* and *Eunectes murinus*, as well as, in two species of the genus *Epicrates*  
63 (*Epicrates maurus* and *Epicrates cenchria*) closely related to the genus *Chilabothrus*  
64 [17-20]. FP confirmed by genetic analysis was also reported for Pythonidae (*Python*  
65 *bivittatus*, *Python regius* and *Malayopython reticulatus*) [16,21], Viperidae  
66 (*Agkistrodon contortrix*) [15,22], Colubridae (*Thamnophis marcianus* and *Thamnophis*  
67 *couchii*) [23,24] and Elapidae (*Oxyuranus scutellatus* and *Acanthophis antarcticus*) [5].  
68 The accurate identification and characterization of parthenogenesis in captive  
69 individuals of non-model species may provide important data to understand the  
70 frequency, causes, consequences and biological mechanisms of asexual reproduction  
71 among vertebrates [1,25].

72 Two interesting reproductive events were recorded for a captive female Cuban  
73 boa (*Chilabothrus angulifer*) isolated from males for eleven years. These occurrences  
74 could be explained by two hypotheses: (i) long-term sperm storage from the last mating  
75 or (ii) parthenogenetic reproduction. Here, we applied molecular and histopathological  
76 methodologies to evaluate these hypotheses, providing the first evidences of facultative  
77 parthenogenesis in a Cuban boa.

78

## 79 **Material and methods**

### 80 **Specimen history and sampling**

81 On 20 September 2017 a 20-year old captive female Cuban boa (*Chilabothrus angulifer*  
82 or *Epicrates angulifer*) from the Zoo da Maia (Maia, Portugal) collection gave birth to a  
83 stillborn and multiple non-embryonated eggs. This female, purchased to the zoological  
84 collection on 1999, had no contact with a male since 2006, when the conspecific male  
85 died. Previously, in 2013, this same female delivered a yellowish mass of non-  
86 developing eggs and a dead neonate that has been preserved on 10% buffered formalin.  
87 The offspring from these two deliveries, one fresh and another formalin fixed, were  
88 analysed in the Histology and Anatomical Pathology Laboratory of Trás-os-Montes e  
89 Alto Douro University (UTAD). Tissues samples were processed for histopathology  
90 according routine technique for light microscopy and staining with haematoxylin and  
91 eosin (HE).

92

### 93 **DNA extraction and microsatellite genotyping**

94 The DNA isolation from the formalin-fixed specimen (neonate 2013) was carried out  
95 using the Quick-DNA Miniprep Plus Kit (Zymo Research) according to manufacturer's

96 protocol, with some additional steps before sample digestion. Briefly, a mixture of  
97 different tissues (liver, lung, gut and skin) was sliced into small pieces with a scalpel.  
98 Then, the tissues were washed with PBS during 24 h (the buffer was replaced twice).  
99 The DNA extraction from muscle tissues of the neonate borne at 2017 was performed  
100 using the NZY Tissue gDNA Isolation kit (Nzytech). The mother's DNA was isolated  
101 from blood using the NZY Blood gDNA Isolation kit (Nzytech). Both extractions were  
102 performed following the standard protocols recommended by the manufacturer.  
103 Thirteen microsatellite markers previously characterized for bovid species were analysed:  
104  $\mu$ sat 1,  $\mu$ sat 10,  $\mu$ sat 13,  $\mu$ sat 24,  $\mu$ sat 32,  $\mu$ sat 36, Ci25, Ci34, Ci35, Ci36, Ci37,  
105 55HDZ554 and 55HDZ617 [19,26-28]. The pre-screening of microsatellite variations  
106 among mother and offspring samples were performed using high-resolution melting  
107 (HRM) analysis [29,30]. PCR amplification and melting acquisition were carried out  
108 using a QuantStudio 3 Real-Time PCR System (Applied Biosystems). The reaction  
109 mixture was prepared in a 20  $\mu$ l final volume containing 10  $\mu$ l of MeltDoctor HRM  
110 Master Mix (Applied Biosystems), 5 pmol of each primer and 5 ng of genomic DNA.  
111 All PCR reactions were performed in duplicate.  
112 The amplification protocol was run as follows: 1 cycle of 95 °C for 10 min; 40 cycles of  
113 95 °C for 15 s, 60 °C for 1 min (fluorescence signal was captured at the end of each  
114 cycle); 1 cycle of 95 °C for 15 s, 60 °C for 1 min and then sequential temperature  
115 increments of 0.025 °C/s with temperature ranging from 60 °C to 95 °C, with continuous  
116 fluorescence measurements. The melting curve data were analysed with the  
117 QuantStudio Design & Analysis software v.1.4 (Applied Biosystems) and High  
118 Resolution Melting (HRM) Software v.3.0.1 (Thermo Fisher Scientific), assessing  
119 differences in melting curve shapes to characterize microsatellite allelic variability.  
120 Forward primers of the microsatellites with variations among samples were labelled

121 with 6-FAM to determine the genotypes using capillary electrophoresis. PCR  
122 amplifications were performed in a total volume of 20  $\mu$ l containing 10  $\mu$ l of 2x MyTaq  
123 HS Mix (Bioline), 5 pmol of each primer and 5 ng DNA. PCR thermal conditions were  
124 as follows: initial denaturation at 95 °C for 5 min, followed by 35 cycles of 95 °C for 30  
125 s, 60 °C for 1 min, 72 °C for 30 s and a final extension at 60 °C for 10 min. Amplified  
126 fragments were electrophoresed on an ABI PRISM 3130xl Genetic Analyzer (Applied  
127 Biosystems) using the GeneScan 500 LIZ size standard. Allele sizes were determined  
128 using Peak Scanner v.3.0.2 (Thermo Fisher Cloud).

129

130

131

## 132 **Results**

133 Macro and microscopically, both reptiles correspond to fully develop stillborn snakes  
134 that showed no morphological alterations except in the 2017 specimen (#2) that present  
135 bilateral anophthalmia (Fig 1). Microscopic examination of organs showed no  
136 alterations and the presence of the reproductive system confirmed both to be female.

137 Of the 13 microsatellite loci screened, two markers ( $\mu$ sat 13 and Ci34) did not  
138 amplify or generated non-specific PCR products. The high-resolution melting (HRM)  
139 analysis allowed the identification of four microsatellite loci ( $\mu$ sat 10,  $\mu$ sat 24, Ci36 and  
140 Ci37) with allelic variability among mother and offspring samples (Fig 2). No evidence  
141 of allelic variability was detected in the remaining loci for the samples analysed (Fig 2).  
142 These results were validated using capillary electrophoresis to determine allele sizes for  
143 all polymorphic markers and two non-polymorphic loci (Table 1). Maternal  
144 heterozygosity was observed for polymorphic loci and a homozygosity pattern was

145 obtained for the non-polymorphic loci analysed (Table 1). The offspring was  
146 homozygous for all microsatellite loci, always carrying an allele present in the mother  
147 (Table 1). The locus Ci37 is a potential null allele in the neonate of 2013, since the  
148 amplification failed using different DNA samples and PCR conditions.

149

150

### 151 **Figure captions**

152 **Fig 1.** Neonates of Cuban boa (*Chilabothrus angulifer*): (a) Neonate of 2013 with a  
153 normal head; (b) Neonate of 2017 with bilateral anophthalmia.

154

155 **Fig 2.** Melting curve profiles obtained in the pre-screening of the microsatellite loci  
156 using HRM analysis. The fluorescence differences in four loci ( $\mu$ sat 10,  $\mu$ sat 24, Ci36  
157 and Ci37) allowed the accurate differentiation of the mother and offspring genotypes  
158 (red and blue curves). No significant fluorescence variations were detected in loci with  
159 same genotype in mother and offspring (Ci35 and 55HDZ617).

160

161

162

163 **Table 1. Genotypes of the mother and offspring characterized for the potentially**  
164 **parthenogenic Cuban boa (*Chilabothrus angulifer*)**

| Individual   | $\mu$ sat 10 | $\mu$ sat 24 | Ci35    | Ci36    | Ci37    | 55HDZ617 |
|--------------|--------------|--------------|---------|---------|---------|----------|
| Mother       | 401/409      | 215/217      | 318/318 | 220/228 | 278/298 | 185/185  |
| Neonate 2013 | 409/409      | 217/217      | 318/318 | 220/220 | -       | 185/185  |
| Neonate 2017 | 409/409      | 215/215      | 318/318 | 228/228 | 298/298 | 185/185  |

165

166

167

## 168 **Discussion**

169 Our results support the first evidence of FP in the Cuban boa (*Chilabothrus angulifer*).

170 The allele homozygosity in the offspring, which carries only alleles present in the

171 mother, are similar to previous cases described of FP reported for boid species [17-20].

172 In Boidae family (for genera Boa and Epicrates), the parthenogenesis was initially

173 detected in all-female litters [18,19]. Similarly, the two stillborn analysed in this study

174 were both females. Accidental FP in captive individuals generally occurs after long

175 periods of isolation from mates [9]. The female in this study had no contact with a

176 conspecific male for 13 years now. Prolonged sperm storage has been documented in

177 various snake species, but the longest time period of suspected sperm storage reported

178 for a snake was seven years and six months [31-33]. In this case the molecular analysis

179 demonstrated the lack of male genetic contribution to the offspring excluding prolonged

180 sperm storage. The high levels of homozygosity detected in the offspring is a

181 characteristic of the parthenogenetic mode explained by terminal fusion automixis

182 [18,19] as recently inferred for long-term captive copperhead (*Agkistrodon contortrix*)

183 and cottonmouth (*Agkistrodon piscivorus*) [5,17].

184 The genome wide homozygosity of parthenogenetic offspring may be related to

185 the development of malformations [3]. Embryos and stillborn offspring with

186 developmental abnormalities (e.g. anophthalmia, microphthalmia, encephalocoele and

187 head foreshortening) has been associated with parthenogenetic events in reptiles

188 [5,9,34]. The morphological evaluation of the Cuban boa neonate born in 2017

189 evidenced bilateral anophthalmia, a malformation found in parthenogenetic offspring of

190 other reptile species [34].



191           In conclusion, we characterized the first record of FP in the Cuban boa  
192 supported by specimen history, histological analysis and molecular markers. This may  
193 have important ecological and evolutionary implications, being interesting to  
194 understand the frequency of this reproductive strategy in captivity, and maybe in the  
195 wild, as recorded for some species [3,15,35]. The increasing number of reports on  
196 parthenogenic births in a wide range of snakes and other vertebrates also evidences the  
197 evolutionary significance of this reproductive phenomena still poorly understood, being  
198 a research field with high potential [8,36]. Therefore, we incentive zoo workers,  
199 veterinarians, curators, wildlife managers and researchers to pay attention to evidences  
200 of abnormal births in this species and related taxa, since these events can be easily  
201 neglected.

202

203

#### 204 **Acknowledgements**

205 F.M. was supported by a Juan de la Cierva postdoctoral fellowship (FJCI-2017-32055).

206 This work was funded by the project UID/CVT/00772/2019 supported by the  
207 Portuguese Science and Technology Foundation (FCT).

208

#### 209 **Conflict of Interest Statement**

210 The authors declare that the research was conducted in the absence of any commercial or  
211 financial relationships that could be construed as a potential conflict of interest.

212

213

214

215 **Author Contributions**

216 All authors listed have made a substantial, direct and intellectual contribution to the  
217 work, and approved it for publication:

218 Fernanda Seixas: Conceptualization, Investigation, Validation, Writing – Original Draft  
219 Preparation

220 Francisco Morinha: Formal Analysis, Investigation, Validation, Writing – Original  
221 Draft Preparation

222 Claudia Luis, Nuno Alvura: Resources, Writing – Original Draft Preparation

223 Maria dos Anjos Pires: Funding Acquisition, Supervision, Writing – Review & Editing

224

225

226 **References**

227 1. Neaves WB, Baumann P. Unisexual reproduction among vertebrates. *Trends Genet.*  
228 2011;27: 81-88. doi: 10.1016/j.tig.2010.12.002.

229 2. van der Kooi CJ, Schwander T. Parthenogenesis: birth of a new lineage or  
230 reproductive accident? *Curr Biol.* 2015;25: R659-R661. doi: 10.1016/j.cub.2015.06.055.

231 3. Booth W, Smith CF, Eskridge PH, Hoss SK, Mendelson JR, Schuett GW. Facultative  
232 parthenogenesis discovered in wild vertebrates. *Biol Lett.* 2012;8: 983–985. doi:  
233 10.1098/rsbl.2012.0666.

234 4. Dudgeon CL, Coulton L, Bone R, Oviden JR, Thomas S. Switch from sexual to  
235 parthenogenetic reproduction in a zebra shark. *Sci Rep.* 2017;7: 40537. doi:  
236 10.1038/srep40537.

- 237 5. Allen L, Sanders KL, Thomson VA. Molecular evidence for the first records of  
238 facultative parthenogenesis in elapid snakes. *R Soc Open Sci.* 2018;5:171901. doi:  
239 10.1098/rsos.171901.  
240
- 241 6. Ennos RA, French GC, Hollingsworth PM. Conserving taxonomic complexity. *Trends*  
242 *Ecol Evol.* 2005;20: 164-168. doi: 10.1016/j.tree.2005.01.012.  
243
- 244 7. Hedrick PW. Virgin birth, genetic variation and inbreeding. *Biol Lett.* 2007;3:715-716.  
245 doi: 10.1098/rsbl.2007.0293.  
246
- 247 8. Lampert KP. Facultative parthenogenesis in vertebrates: reproductive error or  
248 chance? *Sex Dev.* 2008;2: 290-301. doi: 10.1159/000195678.
- 249 9. Booth W, Schuett GW. The emerging phylogenetic pattern of parthenogenesis in  
250 snakes. *Biol J Linn Soc Lond.* 2016;118: 172-186. doi: 10.1111/bij.12744.  
251
- 252 10. Wynn AH, Hikida T, Mori A, Ota H, Matsui M. Morphological variation, karyotype  
253 and reproduction of the parthenogenetic blind snake, *Ramphotyphlops braminus*, from  
254 the insular region of East Asia and Saipan. *Amphibia-Reptilia.* 1991;12: 181-193. doi:  
255 10.1163/156853891X00158.  
256
- 257 11. Kearney M, Fujita MK, Ridenour J. Lost Sex in the Reptiles: Constraints and  
258 Correlations. In: Schön I, Martens K, Dijk P. (eds) *Lost Sex*. Springer, Dordrecht; 2009.  
259 doi: 10.1007/978-90-481-2770-2\_21  
260
- 261 12. Oellacher J. Die Veränderung des unbefruchteten Keimes des Hühnereis im Eileiter

- 262 und bei Bebrütungsversuch. *Ztschr Wiss Zool.* 1872;22: 181–234.
- 263 13. Harmon TS, Kamerman TY, Corwin AL, Sellas AB. Consecutive parthenogenetic  
264 births in a spotted eagle ray *Aetobatus narinari*. *J Fish Biol.* 2016;88: 741–745. doi:  
265 10.1111/jfb.12819.
- 266 14. Ramachandran R, McDaniel CD. 2018 Parthenogenesis in birds: a review.  
267 *Reproduction.* 2018;155: R245-R257. doi: 10.1530/REP-17-0728.
- 268 15. Calvete JJ, Casewell NR, Hernández-Gusmán U, Quesada-Bernat S, Sanz L, Rokyta  
269 DR, et al. Venom Complexity in a Pitviper produced by facultative parthenogenesis. *Sci*  
270 *Rep.* 2018;8:11539. doi: 10.1038/s41598-018-29791-y.
- 271 16. Booth W, Schuett GW, Ridgway A, Buxton DW, Caston TA, Bastone, G., et al.  
272 New insights on facultative parthenogenesis in pythons. *Biol J Linn Soc Lond.*  
273 2014;112: 461–468. doi: 10.1111/bij.12286.
- 274 17. Shibata H, Sakata S, Hirano Y, Nitasaka E, Sakabe A. Facultative parthenogenesis  
275 validated by DNA analyses in the green anaconda (*Eunectes murinus*). *PloS one.*  
276 2017;12: e0189654. doi: 10.1371/journal.pone.0189654.
- 277 18. Booth W, Johnson DH, Moore S, Schal C, Vargo EL. Evidence for viable, non-  
278 clonal but fatherless Boa constrictors. *Biol Lett.* 2011;7: 253-256. doi:  
279 10.1098/rsbl.2010.0793.
- 280 19. Booth W, Million L, Reynolds RG, Burghardt GM, Vargo EL, Schal C, et al.  
281 Consecutive virgin births in the New World boid snake, the Colombian rainbow boa,  
282 *Epicrates maurus*. *J Hered.* 2011;102: 759-763. doi: 10.1093/jhered/esr080.
- 283 20. Kinney ME, Wack RF, Grahn RA, Lyons L. Parthenogenesis in a Brazilian rainbow

- 284 boa (*Epicrates cenchria cenchria*). *Zoo Biol.* 2013;32: 172-176. doi: 10.1002/zoo.21050.
- 285 21. Groot TVM, Bruins E, Breeuwer JAJ. Molecular genetic evidence for  
286 parthenogenesis in the Burmese python, *Python molurus bivittatus*. *Heredity* 2003;90:  
287 130–135. doi: 10.1038/sj.hdy.6800210.
- 288 22. Jordan MA, Perrine-Ripplinger N, Carter E.T. An independent observation of  
289 facultative parthenogenesis in the copperhead (*Agkistrodon contortrix*). *J Herpetol.*  
290 2015;49: 118-121. doi: 10.1670/14-017.
- 291 23. Germano DJ, Smith PT. Molecular evidence for parthenogenesis in the Sierra garter  
292 snake, *Thamnophis couchii* (Colubridae). *Southwest Nat.* 2010;55: 280-282. doi:  
293 10.1894/WL-29.1.
- 294 24. Reynolds RG, Booth W, Schuett GW, Fitzpatrick BM, Burghardt GM. Successive  
295 virgin births of viable male progeny in the checkered gartersnake, *Thamnophis*  
296 *marcianus*. *Biol J Linn Soc Lond.* 2012;107: 566-572. doi: 10.1111/j.1095-  
297 8312.2012.01954.x.
- 298 25. Fujita MK, Moritz C. Origin and evolution of parthenogenetic genomes in lizards:  
299 current state and future directions. *Cytogenet Genome Res.* 2009;127: 261-272. doi:  
300 10.1159/000295177.
- 301 26. Ramanana MA, Bailey CA, Shore GD, Ramilijaona O, Brenneman RA, Louis EE.  
302 Characterization of 20 microsatellite marker loci in the Malagasy tree boa (*Sanzinia*  
303 *madagascariensis madagascariensis*). *Conserv Genet.* 2009;10: 1953. doi:  
304 10.1007/s10592-009-9866-4.
- 305

- 306 27. Tzika AC, Remy C, Gibson R, Milinkovitch MC. Molecular genetic analysis of a  
307 captive-breeding program: the vulnerable endemic Jamaican yellow boa. *Conserv*  
308 *Genet.* 2009;10: 69-77. doi: 10.1007/s10592-008-9519-z.  
309
- 310 28. Reynolds RG, Puente-Rolón AR, Kolodzaïke K, Butler-Smith T. Isolation and  
311 characterization of 23 novel polymorphic microsatellite markers from the endangered  
312 Puerto Rican boa (*Chilabothrus inornatus*) using paired-end Illumina shotgun  
313 sequencing. *Conserv Genet Resour.* 2014;6: 107-109. doi: 10.1007/s12686-013-0016-4.  
314
- 315 29. Mader E, Lukas B, Novak J. A strategy to setup codominant microsatellite analysis  
316 for high-resolution-melting-curve-analysis (HRM). *BMC Genet.* 2008;9: 69. doi:  
317 10.1186/1471-2156-9-69.  
318
- 319 30. Lombal AJ, Wenner TJ, Burrige CP. Assessment of high-resolution melting  
320 (HRM) profiles as predictors of microsatellite variation: an example in Providence  
321 Petrel (*Pterodroma solandri*). *Genes Genomics.* 2015;37: 977-983. doi:  
322 10.1007/s13258-015-0327-9.  
323
- 324 31. Magnusson WE. Production of an embryo by an *Acrochordus javanicus* isolated for  
325 seven years. *Copeia* 1979;4: 744–745. doi:10.2307/1443886.  
326
- 327 32. Booth W, Schuett GW. Molecular genetic evidence for alternative reproductive  
328 strategies in North American pitvipers (Serpentes, Viperidae): long-term sperm storage  
329 and facultative parthenogenesis. *Biol J Linn Soc Lond.* 2011;104, 934–942. doi:  
330 10.1111/j.1095-8312.2011.01782.x.

- 331 33. Birkhead TR, Møller AP. Sexual selection and the temporal separation of  
332 reproductive events: sperm storage data from reptiles, birds and mammals. Biol J Linn  
333 Soc Lond. 1993;50: 295-311. doi: 10.1111/j.1095-8312.1993.tb00933.x.  
334
- 335 34. Billy AJ. Developmental deformities in the parthenogenetic lizard *Cnemidophorus*  
336 *uniparens* (Teiidae) and the "anomalous male" phenomenon. Can J Zool. 1986;64: 2418-  
337 2424. doi: 10.1139/z86-361.  
338
- 339 35. Fields AT, Feldheim KA, Poulakis GR, Chapman DD. 2015 Facultative  
340 parthenogenesis in a critically endangered wild vertebrate. Curr Biol. 2015;25: R446-  
341 R447. doi: 10.1016/j.cub.2015.04.018.  
342
- 343 36. Avise JC. 2015 Evolutionary perspectives on clonal reproduction in vertebrate  
344 animals. Proc Natl Acad Sci USA. 2015;112: 8867-8873. doi:  
345 10.1073/pnas.1501820112.

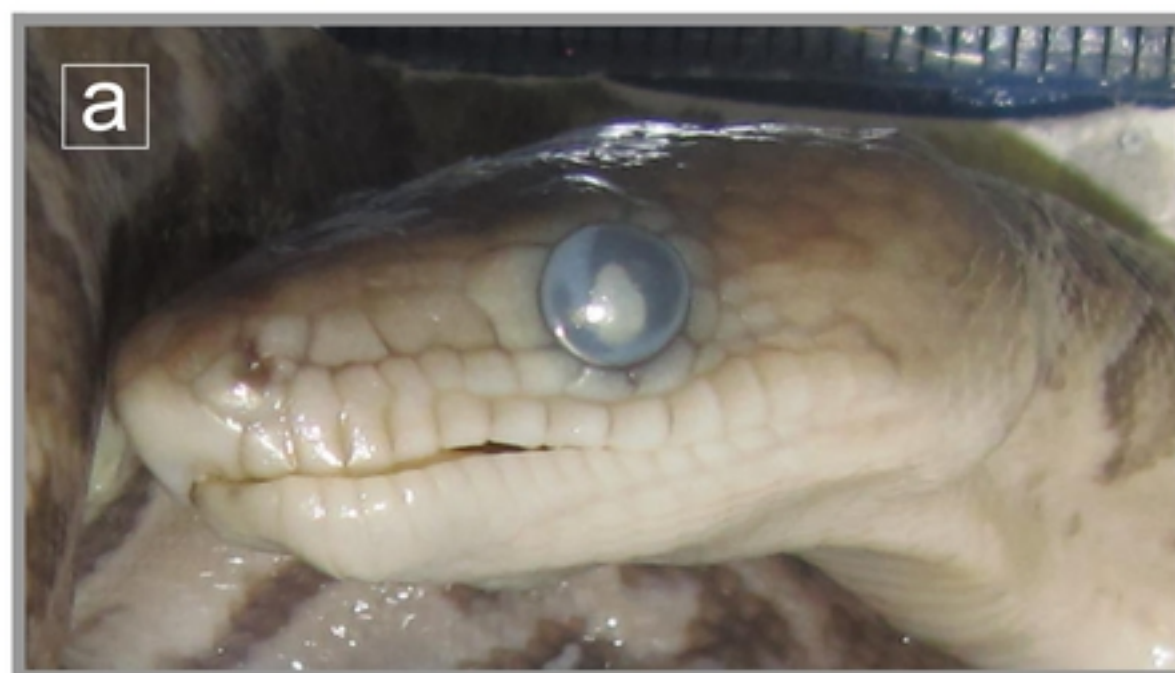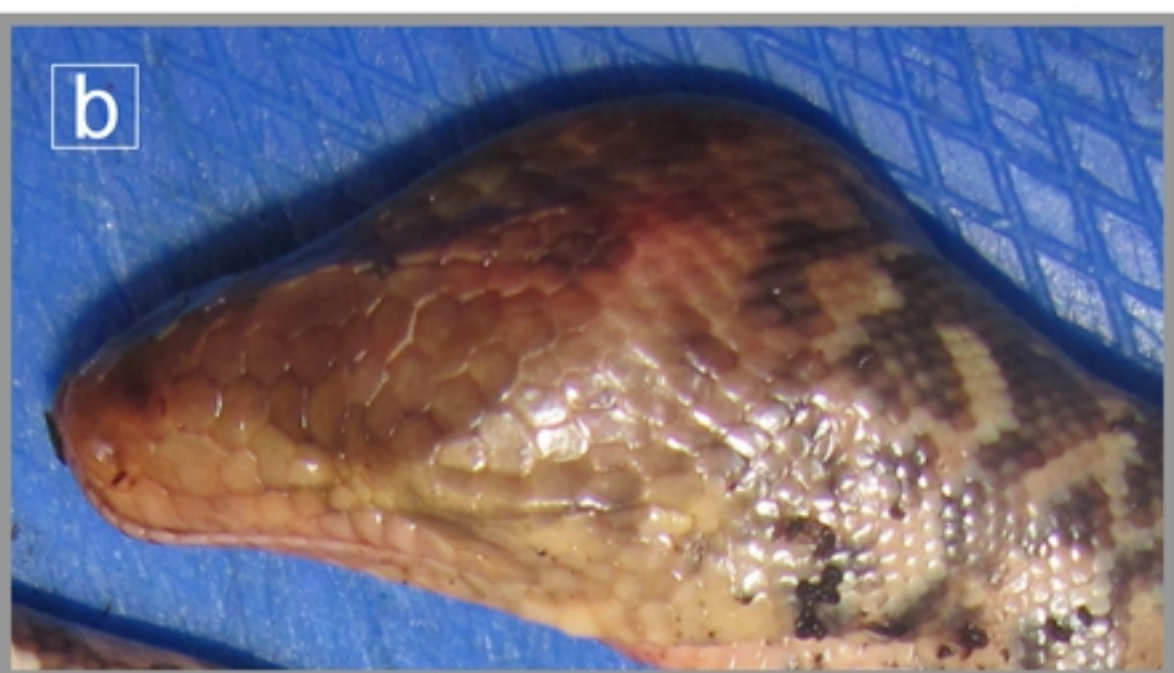

Figure 1



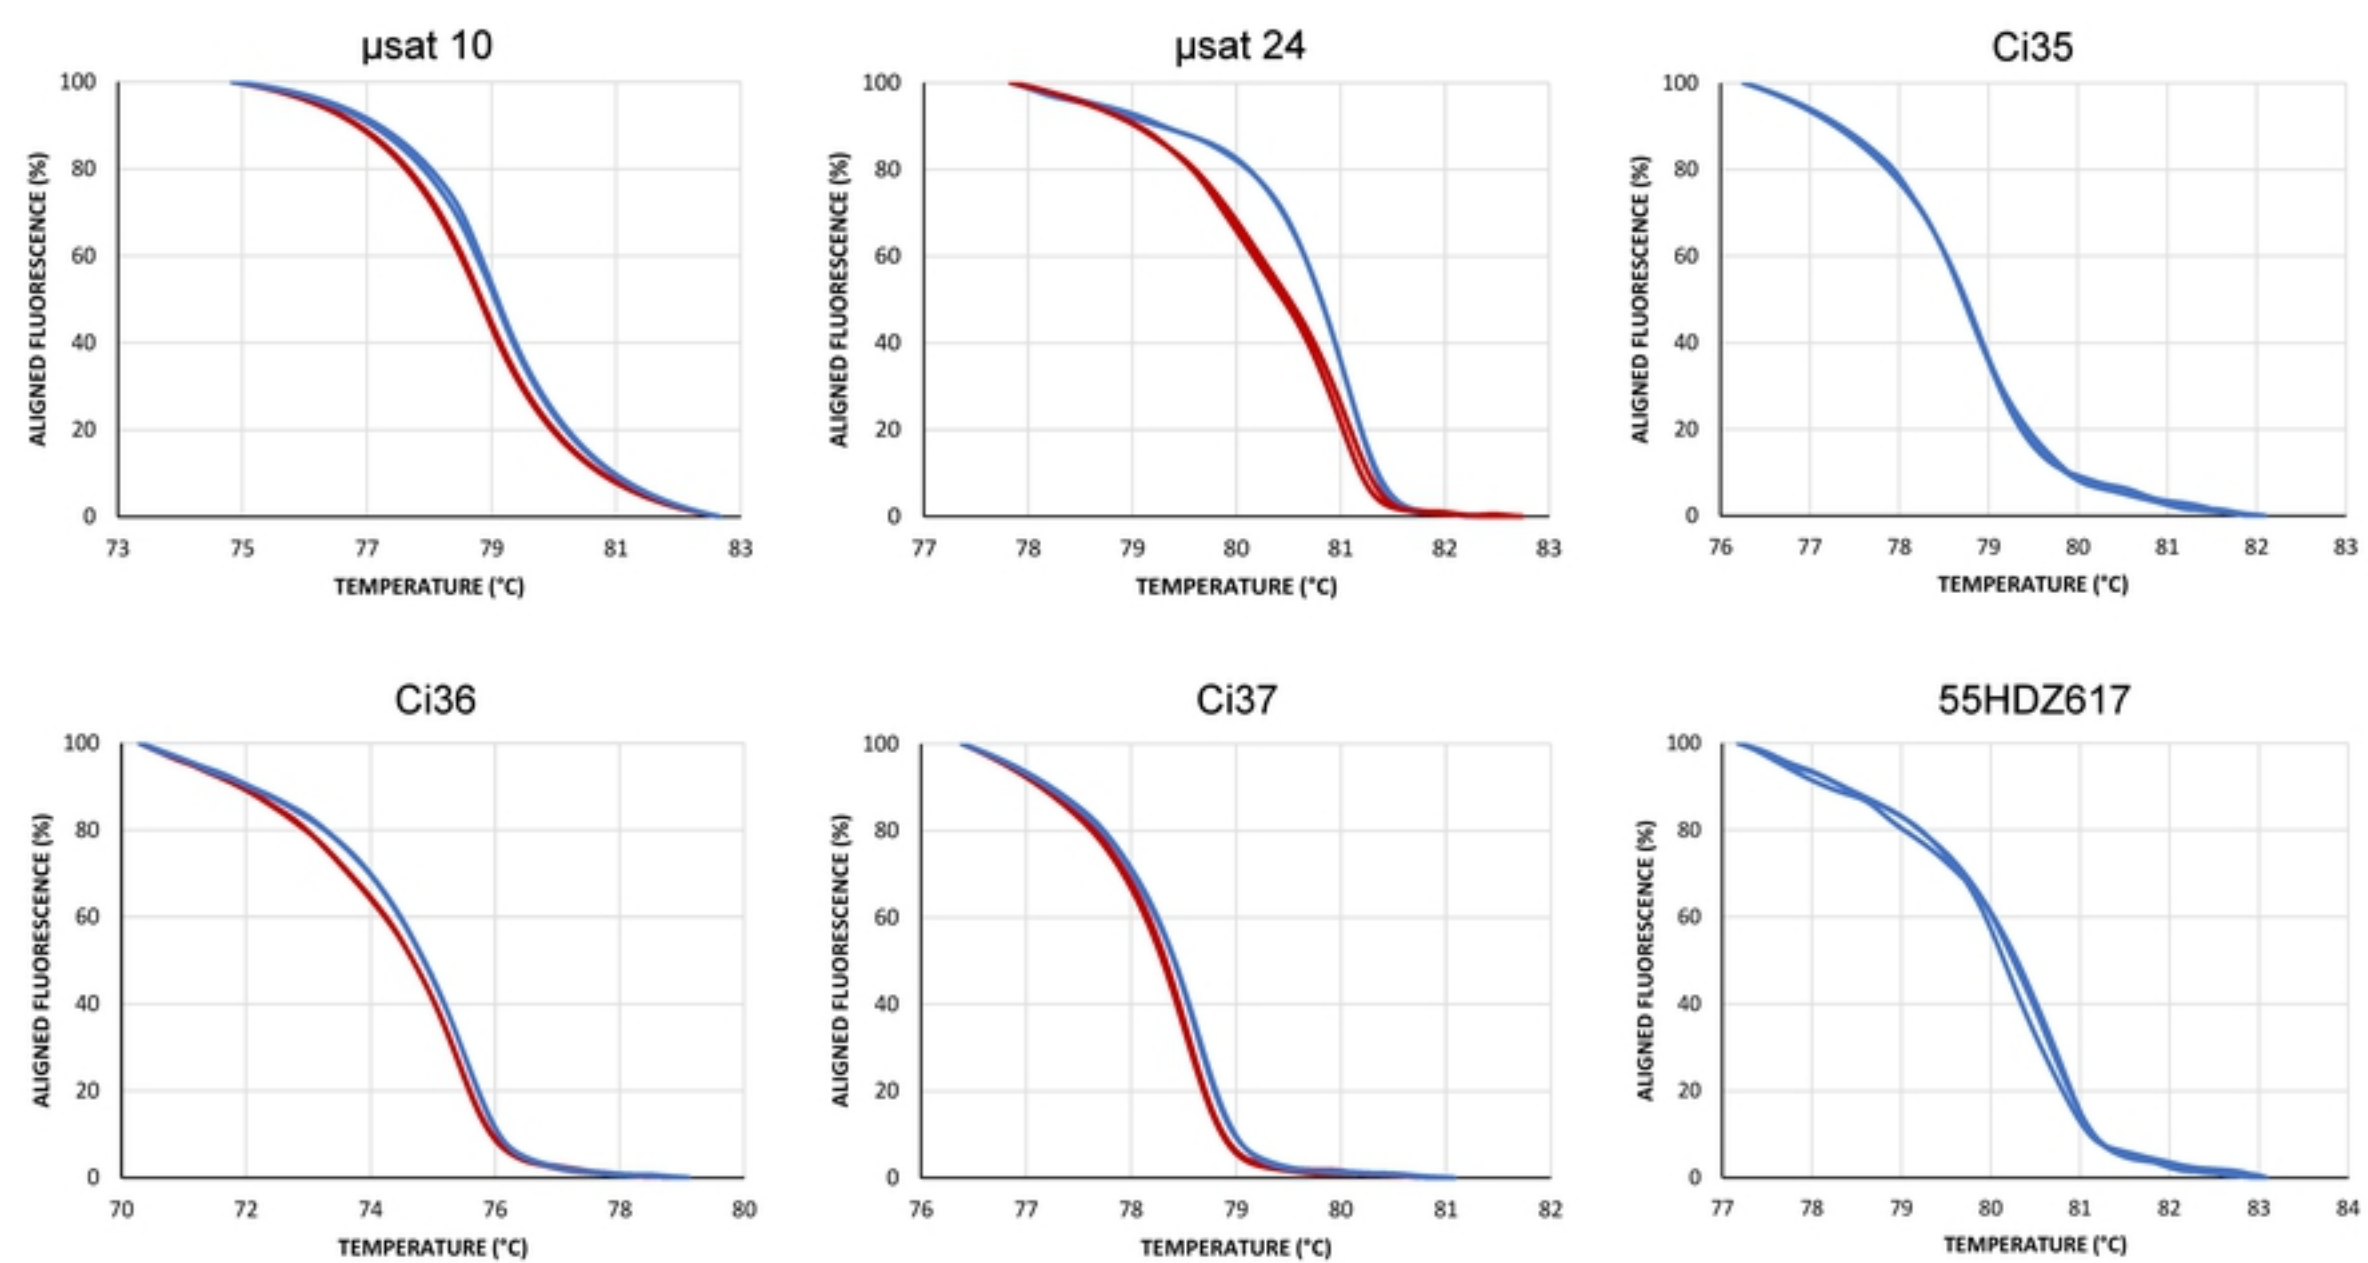

Figure 2
